# Supplementary material for: Circadian glucocorticoid oscillations preserve a population of adult hippocampal neural stem cells in the aging brain
Source: PubMed Central journal article supplement (PMC7303016; doi:10.1038/s41380-019-0440-2), 2019-06-20

A

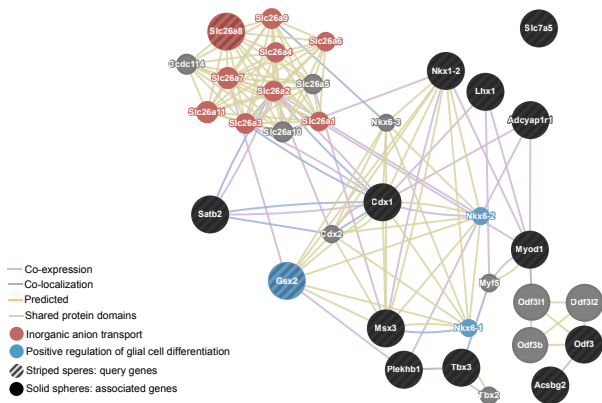

C

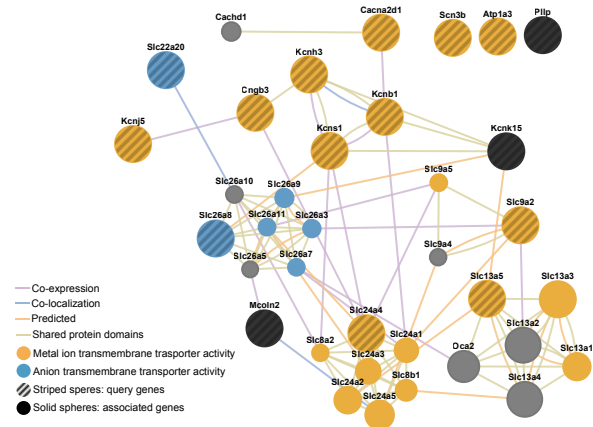

B

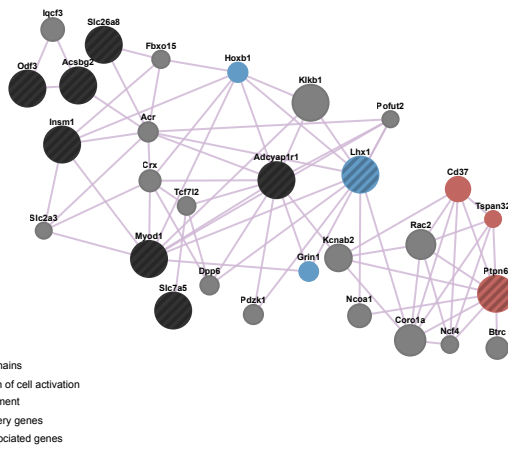

D

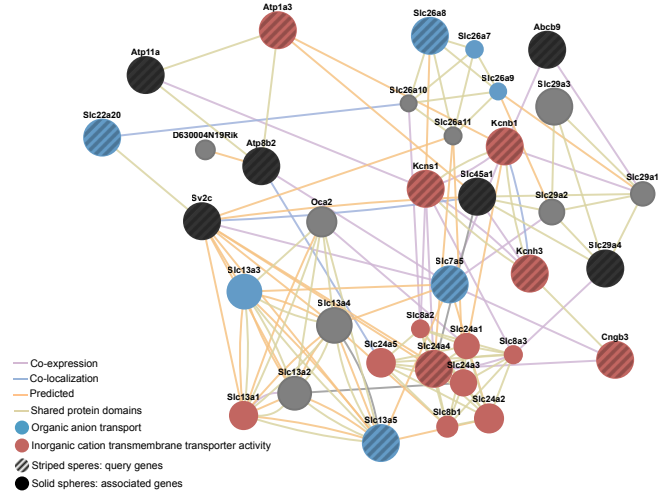

Supplement: 41380_2019_440_MOESM9_ESM.pdf [file 41380_2019_440_MOESM9_ESM.pdf]
